# Supplementary material
Source: Springer Nature journal article supplement (https://www.springermedizin.de/resource/supplementary/13000_2013_893_MOESM1_ESM.pdf/9625238)

**mtDNA copy number**

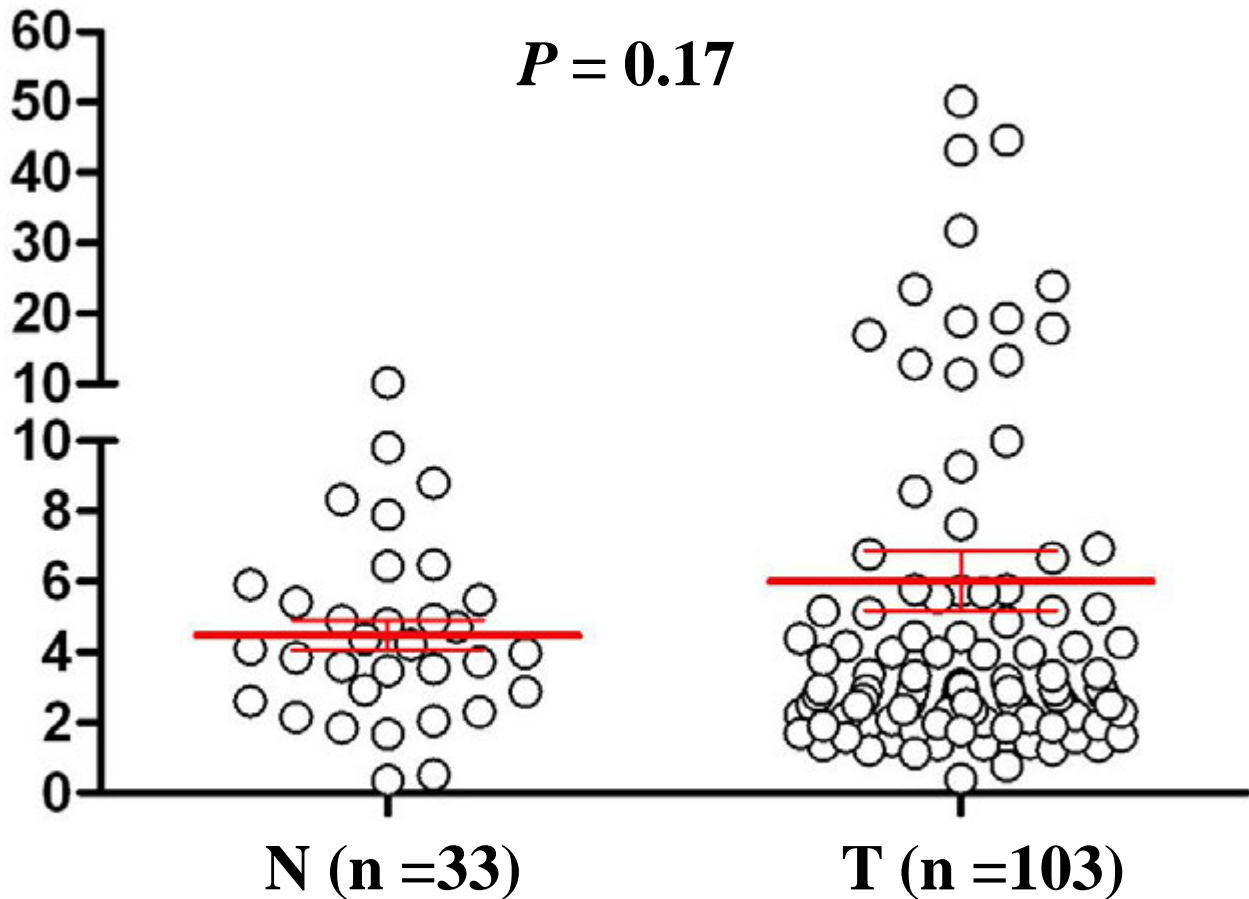

Supplement: MOESM1 [file 9625238]
